# Supplementary material
Source: publisher figshare collection journal article supplement (https://asha.figshare.com/articles/dataset/_/27040873)
Supplement: Supplementary file 1 [file 1]

**Supplemental Material S1.** Individual patient average values Error (pixels), T-Cost (pixels), N-Cost (pixels), and V-RQOL (arbitrary units) on days 1 and 10 of practice.

| Patient ID | Error |        | T-Cost |        | N-Cost |        | V-RQOL |        |
|------------|-------|--------|--------|--------|--------|--------|--------|--------|
|            | Day 1 | Day 10 | Day 1  | Day 10 | Day 1  | Day 10 | Day 1  | Day 10 |
| 1          | 17.97 | 10.41  | 4.85   | 2.65   | 6.87   | 3.46   | 67.5   | 82.5   |
| 2          | 38.90 | 15     | 8.67   | 2.42   | 15.45  | 5.80   | 92.5   | 97.5   |
| 3          | 33.29 | 13.59  | 16.73  | 5.67   | 7.01   | 5.52   | 72.5   | 70.0   |
| 4          | 23.98 | 10.04  | 3.01   | 2.04   | 13.37  | 5.79   | 35.0   | 80.0   |
| 5          | 49.69 | 12.72  | 23.17  | 3.31   | 7.71   | 4.33   | 22.5   | 77.5   |
| 6          | 21.49 | 17.78  | 2.51   | 4.64   | 13.69  | 8.38   | 77.5   | 92.5   |
| 7          | 32.08 | 20.19  | 4.53   | 10.13  | 19.19  | 7.61   | 82.5   | 82.5   |
| 8          | 69.60 | 16.86  | 6.37   | 1.68   | 22.25  | 12.77  | 87.5   | 95.0   |
| 9          | 24.47 | 13.38  | 2.26   | 2.53   | 16.08  | 5.55   | 82.5   | 87.5   |
| 10         | 125.8 | 11.31  | 41.57  | 2.89   | 14.23  | 4.30   | 35.0   | 80.0   |
