# Supplementary material
Source: publisher figshare collection journal article supplement (https://asha.figshare.com/articles/dataset/_/27040873)
Supplement: Supplementary file 2 [file 1]

**Supplemental Material S2.** Individual NPVH indices (logit) for patients during early practice trials, late practice trials, and spontaneous speech during day 1, before day 10 practice, and after day 10 practice.

| Patient ID | Trials |        | Spontaneous Speech |               |              |
|------------|--------|--------|--------------------|---------------|--------------|
|            | Day 1  | Day 10 | Day 1              | Before Day 10 | After Day 10 |
| 1          | 0.490  | -      | 0.391              | -0.693        | 1.048        |
| 2          | 0.278  | -      | 2.073              | -2.393        | 2.459        |
| 3          | -      | -      | 1.482              | -2.246        | 2.107        |
| 4          | -      | -      | 1.066              | -1.505        | 1.166        |
| 5          | 1.471  | 2.525  | 0.558              | -0.539        | 0.898        |
| 6          | 0.302  | 1.231  | 2.204              | NA            | 1.305        |
| 7          | 0.076  | 0.152  | 1.004              | -1.150        | 0.294        |
| 8          | 0.599  | 0.306  | 1.097              | -0.768        | 0.969        |
| 9          | 0.262  | 0.298  | 1.112              | -0.555        | 0.707        |
| 10         | 1.119  | 2.344  | 1.732              | -1.548        | 0.925        |

NA = Not acquired.
